# Supplementary material for: A Pragmatic Approach to Susceptibility Classification of Yeasts without EUCAST Clinical Breakpoints
Source: MDPI journal article supplement (doi:10.3390/jof8020141), 2022-01-30
Supplement: s1 [file Supplementary List S1.pdf › Supplementary List S1.pdf]

### **S1: Supplementary list of various *Candida* and yeast species names.**

This is not a full list showing all taxonomic revisions but is only intended as a help to list selected current and previous names of primarily the species included in this manuscript. Current name is stated in bold.

#### Current and obsolete names for *Candida* species

|                                 |                                                                                           |
|---------------------------------|-------------------------------------------------------------------------------------------|
| <i>C. bovina</i>                | <b><i>Kazachstania bovina</i></b>                                                         |
| <i>C. catenulata</i>            | <b><i>Diutina catenulata</i></b>                                                          |
| <i>C. ciferrii</i>              | <b><i>Trichomonascus ciferrii</i></b>                                                     |
| <i>C. eremophila</i>            | <b><i>Pichia kluyveri</i></b> (used)                                                      |
| <i>C. fabianii</i>              | <b><i>Cyberlindnera fabianii</i></b> , <i>Pichia fabianii</i>                             |
| <i>C. famata</i>                | <b><i>Debaryomyces hansenii</i></b>                                                       |
| <i>C. fermentati</i>            | <b><i>Meyerozyma caribbica</i></b> , <i>Pichia caribbica</i>                              |
| <i>C. guilliermondii</i>        | <b><i>Meyerozyma guilliermondii</i></b>                                                   |
| <i>C. inconspicua</i>           | <b><i>Pichia cactophila</i></b> , <i>Torulopsis inconspicua</i>                           |
| <b><i>C. intermedia</i></b>     | <i>Blastodendron intermedius</i> , <i>Cryptococcus intermedius</i>                        |
| <i>C. kefyr</i>                 | <b><i>Kluyveromyces marxianus</i></b>                                                     |
| <i>C. krusei</i>                | <b><i>Pichia kudriavzevii</i></b> , <i>Isatchenkii orientalis</i>                         |
| <i>C. lambica</i>               | <b><i>Pichia fermentans</i></b>                                                           |
| <i>C. lipolytica</i>            | <b><i>Yarrowia lipolytica</i></b>                                                         |
| <i>C. lusitaniae</i>            | <b><i>Clavispora lusitaniae</i></b>                                                       |
| <b><i>C. magnoliae</i></b>      | <i>Torulopsis magnoliae</i> , <i>Starmerella magnoliae</i>                                |
| <i>C. norvegensis</i>           | <b><i>Pichia norvegensis</i></b>                                                          |
| <b><i>C. palmioleophila</i></b> | -                                                                                         |
| <i>C. pararugosa</i>            | <b><i>Wickerhamiella pararugosa</i></b>                                                   |
| <i>C. pelliculosa</i>           | <b><i>Wickerhamomyces anomalus</i></b> , <i>Pichia anomala</i> , <i>Hansenula anomala</i> |
| <i>C. pulcherrima</i>           | <b><i>Metschnikowia pulcherrima</i></b>                                                   |
| <i>C. rugosa</i>                | <b><i>Diutina rugosa</i></b>                                                              |
| <i>C. thermophila</i>           | <b><i>Ogataea polymorpha</i></b> , <i>Hansenula polymorpha</i>                            |
| <i>C. utilis</i>                | <b><i>Cyberlindnera jadinii</i></b> , <i>Pichia jadinii</i>                               |

Current and former Non-*Candida* yeast species:

|                                         |                                                                                                                                                                 |
|-----------------------------------------|-----------------------------------------------------------------------------------------------------------------------------------------------------------------|
| <b><i>Lodderomyces elongisporus</i></b> | <i>Saccharomyces elongisporus</i>                                                                                                                               |
| <b><i>Magnusiomyces clavatus</i></b>    | <i>Saprochaeta clavata</i> , <i>Geotrichum clavatum</i>                                                                                                         |
| <b><i>Magnusiomyces capitatus</i></b>   | <i>Geotrichum capitatum</i> , <i>Blastoschizomyces capitatus</i> ,<br><i>Dipodascus capitatus</i> , <i>Saprochaeta capitata</i> , <i>Trichosporon capitatum</i> |
| <b><i>Geotrichum candidum</i></b>       | <i>Galactomyces candidus</i> , <i>Endomyces/Dipodascus/Galactomyces geotrichum</i>                                                                              |
| <i>Cryptococcus albidus</i>             | <b><i>Naganishia albida</i></b>                                                                                                                                 |
| <b>(<i>Barnettozyma salicaria</i>)</b>  | <i>Pichia salicaria</i> )                                                                                                                                       |
| <i>Trichosporon dermatis</i>            | <b><i>Cutaneotrichosporon dermatis</i></b>                                                                                                                      |
| ( <i>Williopsis saturnus</i>            | <b><i>Cyberlindnera saturnus</i></b> , <i>Saccharomyces saturnus</i> )                                                                                          |
| <i>Saccharomyces telluris</i>           | <b><i>Kazachstania telluris</i></b>                                                                                                                             |
| <b><i>Exophiala dermatitidis</i></b>    | <i>Wangiella dermatitidis</i>                                                                                                                                   |

Based on: de Hoog GS, Guarro J, Gené J, Ahmed S, Al-Hatmi AMS, Figueras MJ & Vitale RG (2020) Atlas of Clinical Fungi, 4th edition. Hilversum except for species names in parentheses (not in the Atlas) found at: <https://www.ncbi.nlm.nih.gov/Taxonomy/Browser/wwwtax.cgi> (both accessed 25.11.2021).
